# Supplementary material for: Dual active-sites of Co and oxygen vacancies in Co-doped CeO2-catalyzed toluene oxidation for the subsequent Knoevenagel condensation process
Source: Royal Society of Chemistry journal article supplement (doi:10.1039/d3gc02466k), 2023-01-01
Supplement: d3gc02466k1.pdf [file d3gc02466k1.pdf]

**Dual-active sites of Co and oxygen vacancy in Co-doped CeO<sub>2</sub>  
catalyzed toluene oxidation for consequent Knoevenagel  
condensation**

Yong Zou<sup>a</sup>, Yuxuan Liu<sup>a</sup>, Sai Zhang<sup>a,b\*</sup> and Yongquan Qu<sup>a,\*</sup>

<sup>a</sup> *School of Chemistry and Chemical Engineering, Northwestern Polytechnical University, Xi'an 710072, China*

<sup>b</sup> *Research & Development Institute of Northwestern Polytechnical University in Shenzhen, Shenzhen 518057, China;*

**E-mail:** [zhangsai1112@nwpu.edu.cn](mailto:zhangsai1112@nwpu.edu.cn) and [yongquan@nwpu.edu.cn](mailto:yongquan@nwpu.edu.cn)

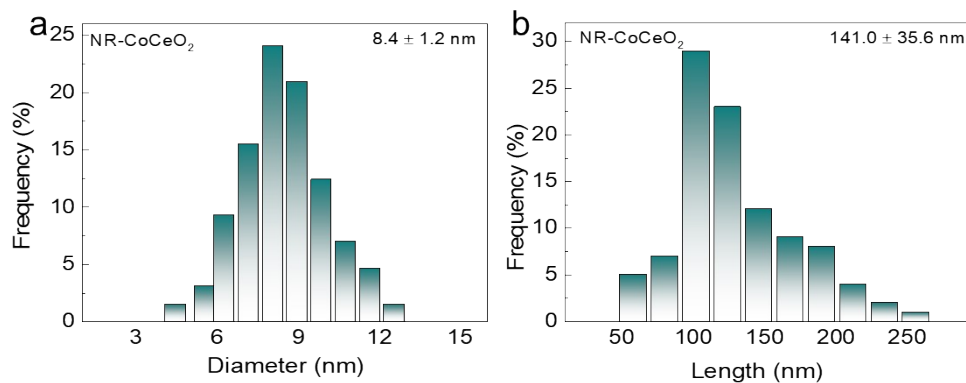

**Figure S1.** The (a) diameter and (b) length of the NR-CoCeO<sub>2</sub> catalysts.

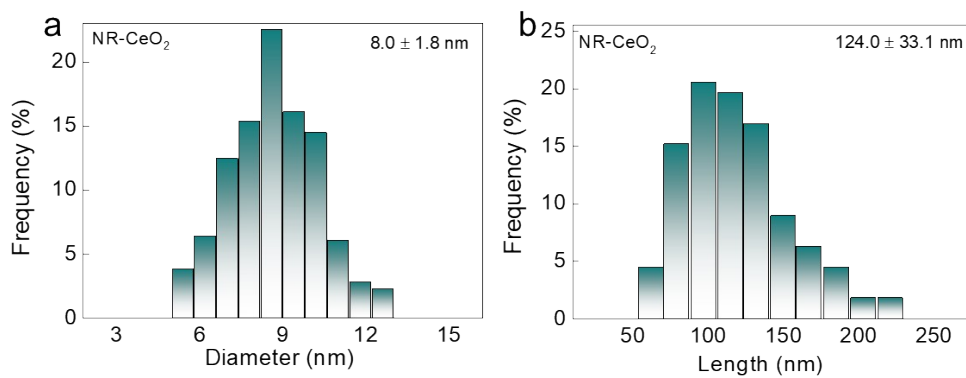

**Figure S2.** The (a) diameter and (b) length of the NR-CeO<sub>2</sub> catalysts.

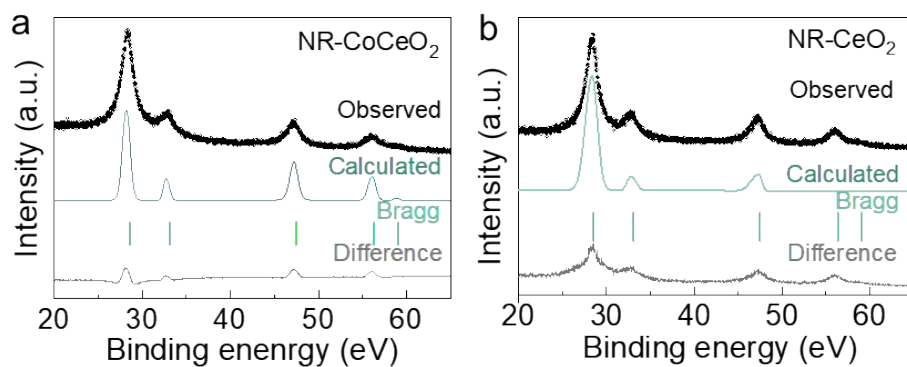

**Figure S3.** Rietveld refinement XRD analysis of (a) NR-CoCeO<sub>2</sub> and (b) NR-CeO<sub>2</sub>.

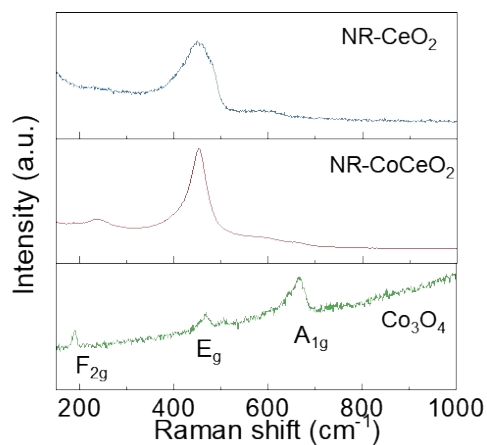

**Figure S4.** Raman profiles of NR-CoCeO<sub>2</sub>, NR-CeO<sub>2</sub> and Co<sub>3</sub>O<sub>4</sub> catalysts.

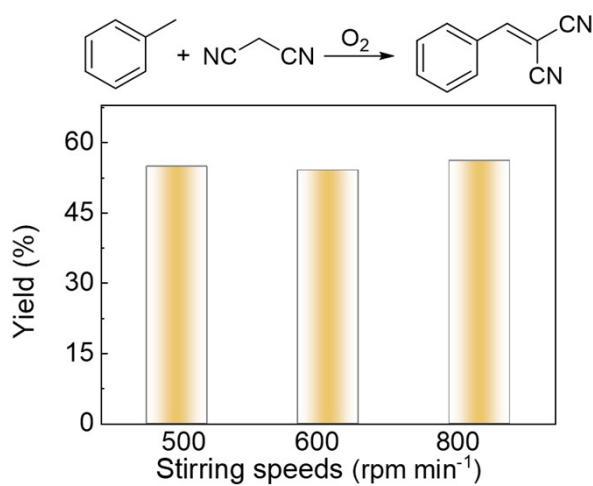

**Figure S5.** The influence of stirring speeds on catalytic preformation of the tandem transformation of toluene and malononitrile into benzylidenemalononitrile. **Reaction conditions:** toluene (2.0 mL), malononitrile (0.5 mmol), catalysts (5.0 mg), 140 °C and 0.5 MPa O<sub>2</sub>.

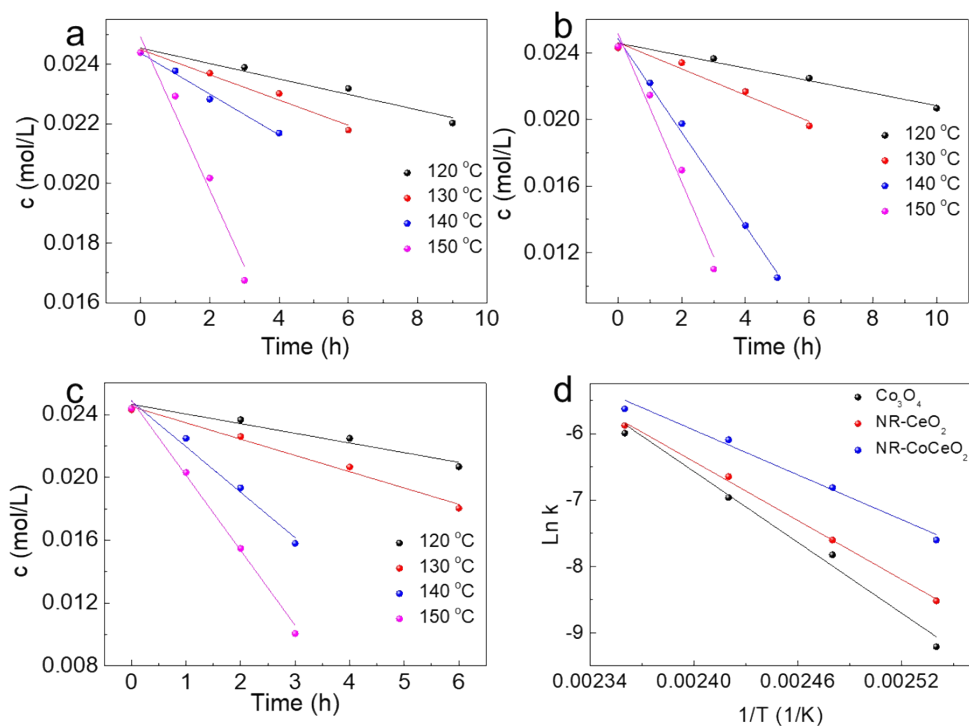

**Figure S6.** Catalytic behavior of (a)  $\text{Co}_3\text{O}_4$ , (b) NR- $\text{CeO}_2$  and (c) NR-CoCe $\text{O}_2$  for the tandem transformation of toluene and malononitrile into benzylidenemalononitrile at various reaction temperatures. (d) And the plot of  $\text{Ln } k$  as function of  $(1/T)$  for  $\text{Co}_3\text{O}_4$ , NR- $\text{CeO}_2$  and NR-CoCe $\text{O}_2$  catalyzed transfer of toluene and malononitrile into benzylidenemalononitrile. **Reaction conditions:** toluene (2 mL), malononitrile (0.5 mmol), catalysts (5 mg) and 0.5 MPa  $\text{O}_2$ .

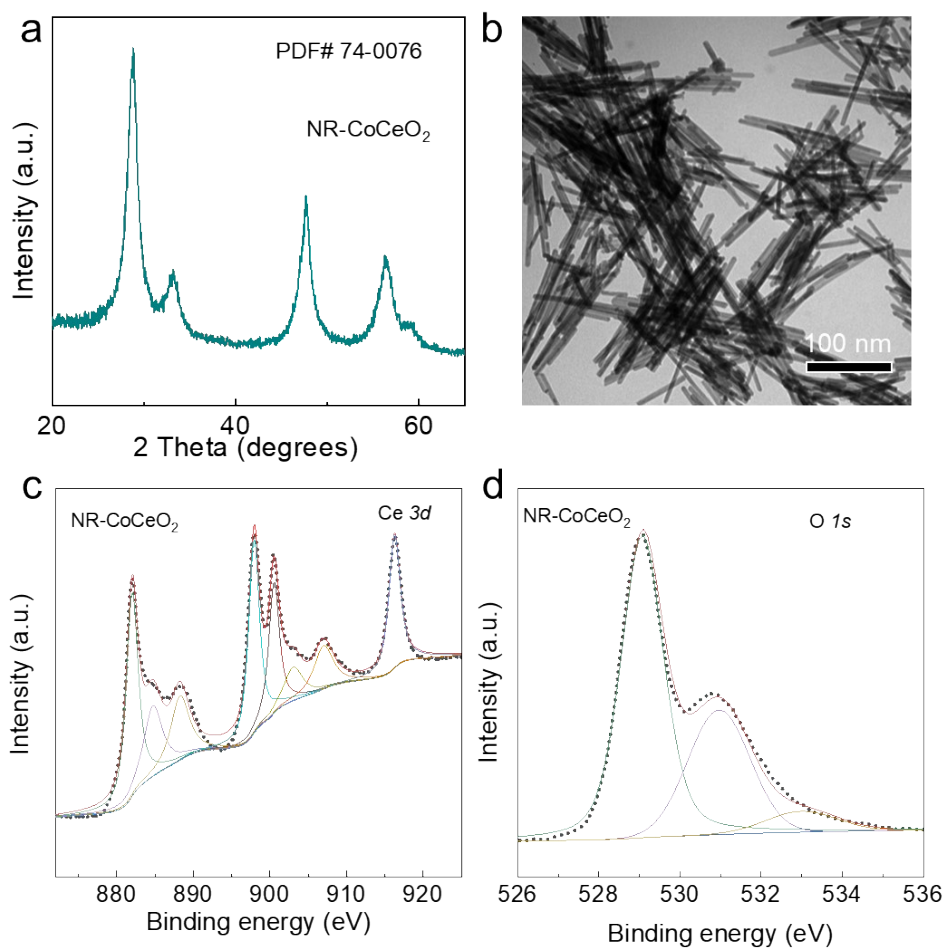

**Figure S7.** (a) XRD pattern, (b) TEM image, and XPS analysis of (c) Ce  $3d$  and (d) O  $1s$  for the used NR-CoCeO<sub>2</sub> catalysts.

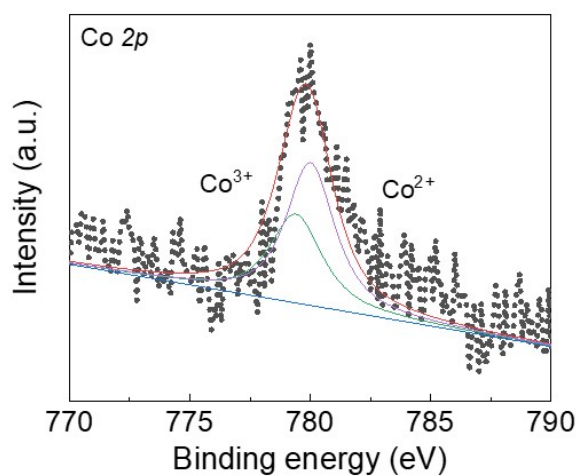

**Figure S8.** XPS analysis of Co  $2p$  for the NR-CoCeO<sub>2</sub> catalysts.

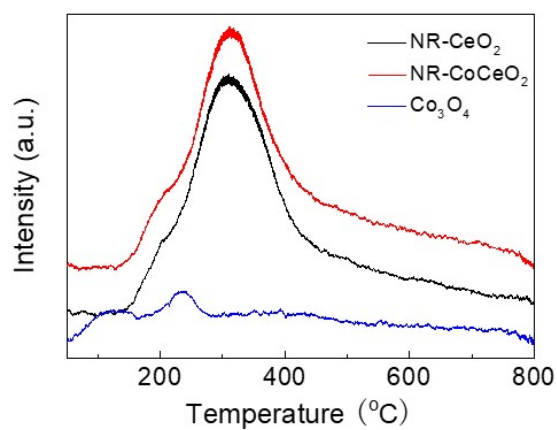

**Figure S9.** The capability to activate  $O_2$  of NR- $CeO_2$ , NR- $CoCeO_2$  and  $Co_3O_4$  catalysts.

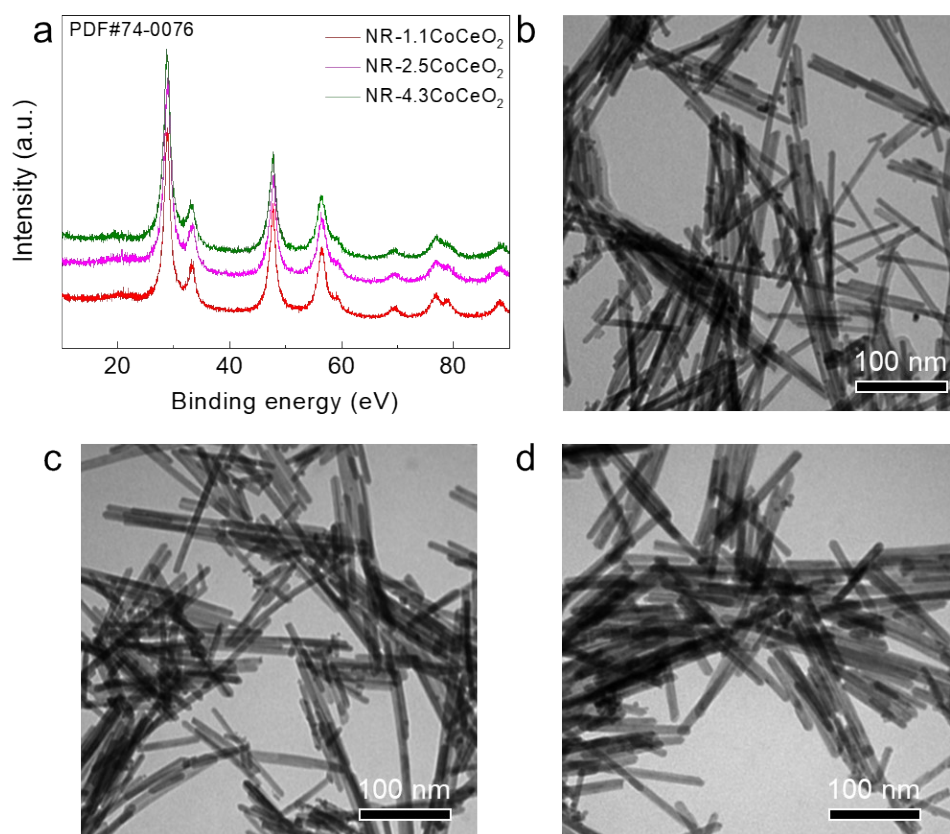

**Figure S10.** (a) XRD pattern and TEM images for the NR- $CoCeO_2$  catalysts with Co loading of (b) 1.06 wt.%, (c) 2.45 wt.% and (d) 4.32 wt.%, respectively.

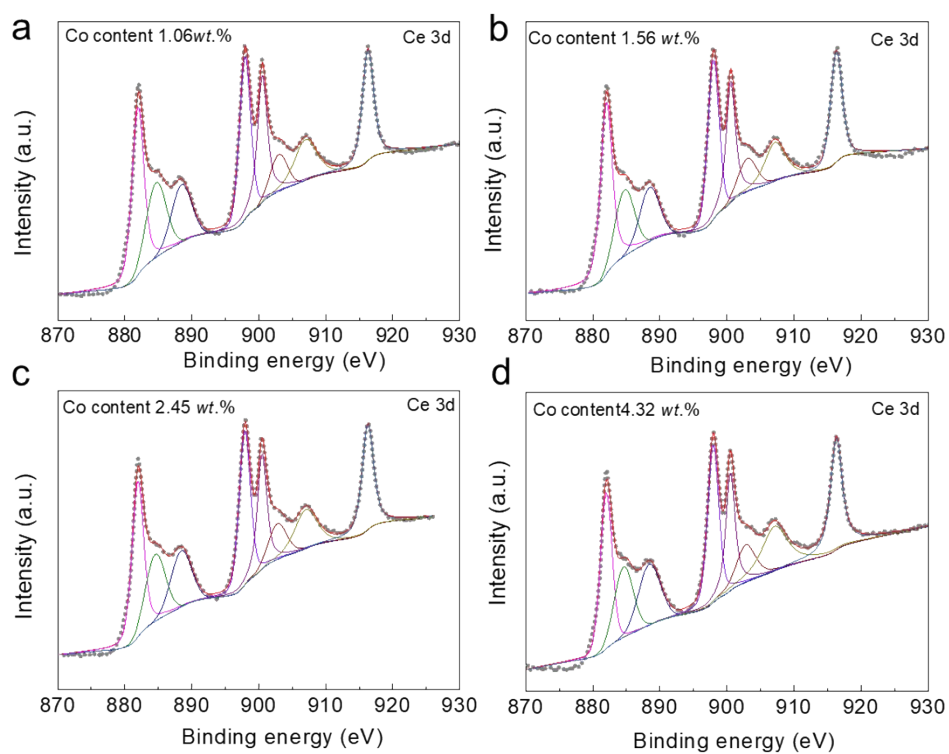

**Figure S11.** XPS analysis of Ce 3d for the NR-CoCeO<sub>2</sub> catalysts with Co loading of (a) 1.06 wt.%, (b) 1.56 wt.%, (c) 2.45 wt.% and (d) 4.32 wt.%, respectively.

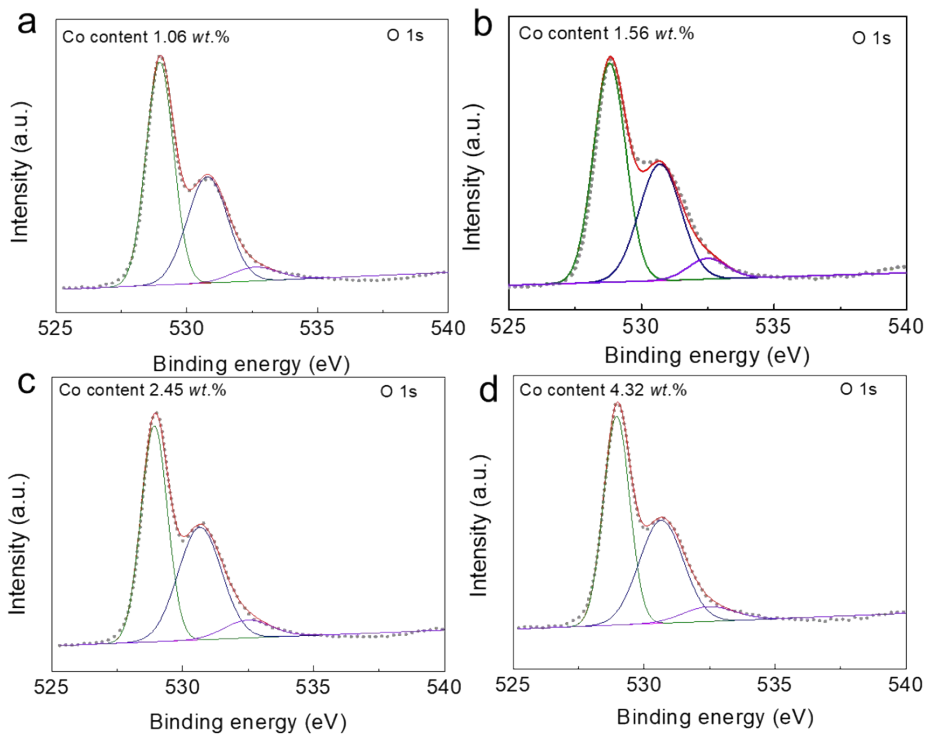

**Figure S12.** XPS analysis of O 1s for the NR-CoCeO<sub>2</sub> catalysts with Co loading of (a) 1.06 wt.%, (b) 1.56 wt.%, (c) 2.45 wt.% and (d) 4.32 wt.%, respectively.

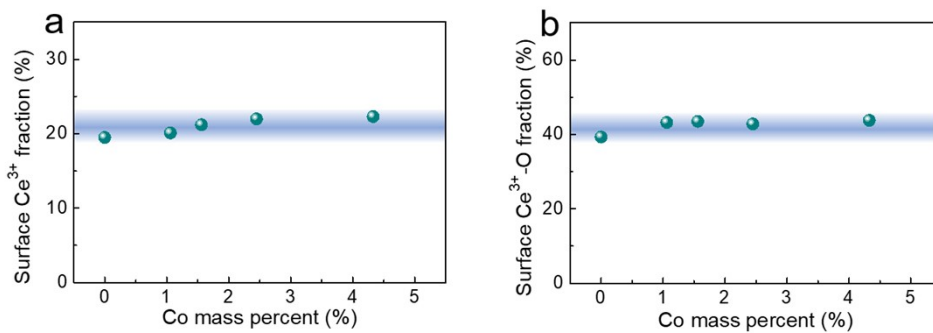

**Figure S13.** The influence of Co precontents on the surface (a) Ce<sup>3+</sup> and (b) Ce<sup>3+</sup>-O fraction of the NR-CoCeO<sub>2</sub> catalysts.



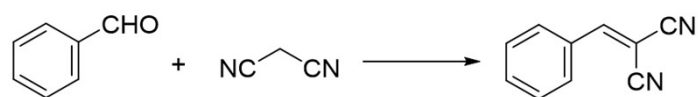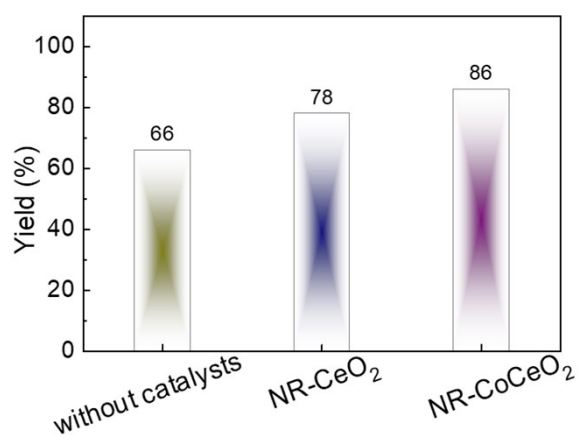

**Figure S14.** Catalytic preformation of various catalysts for the condensation of benzaldehyde and malononitrile into benzylidenemalononitrile. **Reaction conditions:** benzaldehyde (2 mL), malononitrile (0.5 mmol), catalysts (5 mg), 2 h and 60 °C.
